# Supplementary material for: Strain and crystallographic identification of the helically concaved gap surfaces of chiral nanoparticles
Source: Springer Nature journal article supplement (doi:10.1038/s41467-023-39255-1), 2023-06-17
Supplement: 41467_2023_39255_MOESM2_ESM.pdf [file 41467_2023_39255_MOESM2_ESM.pdf]

### **Description of Additional Supplementary Files Document**

**Supplementary Movie. 1** | Terrace area fitting procedure for cubic nanoparticle. Surface Miller-index of cubic nanoparticle with varying rotation angle along  $+y'$  (in Supplementary Fig. 4a) from  $-60^\circ \sim 60^\circ$  with  $2^\circ$  step size. At the center, the overall Miller-index of the plane becomes  $\{100\}$  series except for the edge and corner of the nanoparticle that produces the “most red” color-coding result.
